# Supplementary material
Source: ML conference proceedings conference paper supplement (https://aclanthology.org/D17-1094)
Supplement: Attachment [file yavuz_emnlp2017_appendix.pdf › yavuz_emnlp2017_appendix.pdf]

## A Implementation details of alternative solutions

Following (Tan et al., 2016), we use the same bidirectional LSTM for both questions and textual evidences. For the attentive model, we apply the attention mechanism on the question side because our objective is to match textual evidences to the question context unlike the original model. We use average pooling for both models and compute the *general* attention via a bilinear term that has been shown effective in (Luong et al., 2015).

For the model and training parameters, we follow the strategy described in Section 5.1 with a difference that  $\lambda$  is tuned to be 0.2 in this setting. This intuitively makes sense because the score  $\text{sim}(q, r)$  is in  $[-1, 1]$ .

To clarify the question and answer sides for the alternative models, we provide concrete examples in Table 1 for the running example.

| Question Side               | Answer Side      | Model Name              |
|-----------------------------|------------------|-------------------------|
| what did #entity# fight for | activist         | ALT.-(equiv <b>EC</b> ) |
| what did #entity# fight for | activism issue   | ALT.-(equiv <b>AC</b> ) |
| what did #entity# fight for | area of activism | ALT.-(equiv <b>RC</b> ) |

Table 1: Question ( $q$ ) and answer ( $a$ ) sides used for alternative (e.g., ALT.) solutions QA-LSTM and ATTENTIVE-LSTM.

## B Combining multiple question revision strategies

We also performed experiments combining multiple question revisions that may potentially capture complementary signals. To this end, let  $s_1, \dots, s_k$  be the trained scoring functions with question revisions constructed by  $m_1, \dots, m_k$ , we define  $s(q, r) = \sum_{i=1}^k \gamma_i s_i(q, r)$  where  $\gamma \in \mathbb{R}^k$  is a weight vector that is trained using the same objective defined in Equation 5. This strategy is used to obtain **AC+RC** model reported in experimental results by combining **AC** and **RC** for  $k = 2$ .

## References

- Minh-Thang Luong, Hieu Pham, and Christopher D. Manning. 2015. Effective approaches to attention-based neural machine translation. In *Empirical Methods on Natural Language Processing (EMNLP)*.
- Ming Tan, Cicero dos Santos, Bing Xiang, and Bowen Zhou. 2016. Improved representation learning for question answer matching. In *Annual Meeting of the Association for Computational Linguistics (ACL)*.
